# Supplementary material for: Cytological Pattern Reveals Genome Downsizing in Cynodon dactylon (L.) Pers along the Longitudinal Gradient
Source: MDPI journal article supplement (doi:10.3390/agronomy13081984), 2023-07-27
Supplement: s1 [file s1]

**Supplementary Table S1** The values of particles, mean, median and CV of each sample in *Cynodon dactylon* and *Pisum sativum* L. were measured by flow cytometry

| Codes | Species                 | Particles | Mean     | CV(%) | Median |
|-------|-------------------------|-----------|----------|-------|--------|
| A1    | <i>Cynodon dactylon</i> | 848 (10%) | 2687.93  | 2.71  | 2683   |
|       | <i>Pisum sativum</i> L. | 765 (9%)  | 10885.52 | 2.75  | 10895  |
| A3    | <i>Cynodon dactylon</i> | 274 (6%)  | 4378.97  | 2.84  | 4363   |
|       | <i>Pisum sativum</i> L. | 620 (15%) | 11111.51 | 3.08  | 11114  |
| A5    | <i>Cynodon dactylon</i> | 183 (10%) | 4887.96  | 3.01  | 4871   |
|       | <i>Pisum sativum</i> L. | 248 (13%) | 14163.58 | 2.99  | 14202  |
| A6    | <i>Cynodon dactylon</i> | 431 (17%) | 3394.00  | 3.13  | 3397   |
|       | <i>Pisum sativum</i> L. | 150 (6%)  | 12281.97 | 2.81  | 12314  |
| A7    | <i>Cynodon dactylon</i> | 110 (9%)  | 4668.33  | 3.15  | 4662   |
|       | <i>Pisum sativum</i> L. | 148 (13%) | 12979.66 | 2.79  | 12975  |
| A9    | <i>Cynodon dactylon</i> | 145 (7%)  | 4197.51  | 3.19  | 4209   |
|       | <i>Pisum sativum</i> L. | 287 (14%) | 13594.05 | 2.87  | 13602  |
| A10   | <i>Cynodon dactylon</i> | 312 (11%) | 2967.96  | 2.91  | 2969   |
|       | <i>Pisum sativum</i> L. | 363 (13%) | 10415.72 | 3.15  | 10385  |
| A11   | <i>Cynodon dactylon</i> | 179 (5%)  | 4580.41  | 2.83  | 4584   |
|       | <i>Pisum sativum</i> L. | 392 (13%) | 14117.07 | 2.95  | 14125  |
| A12   | <i>Cynodon dactylon</i> | 247 (7%)  | 4557.83  | 2.92  | 4568   |
|       | <i>Pisum sativum</i> L. | 496 (14%) | 13301.42 | 2.98  | 13306  |

|     |                         |            |          |      |       |
|-----|-------------------------|------------|----------|------|-------|
| A13 | <i>Cynodon dactylon</i> | 151 (7%)   | 4685.97  | 2.94 | 4686  |
|     | <i>Pisum sativum</i> L. | 268 (13%)  | 12606.60 | 2.69 | 12594 |
| A14 | <i>Cynodon dactylon</i> | 356 (12%)  | 9353.29  | 3.04 | 9361  |
|     | <i>Pisum sativum</i> L. | 321 (11%)  | 3167.46  | 2.84 | 3167  |
| A16 | <i>Cynodon dactylon</i> | 135 (12%)  | 3965.36  | 3.04 | 3969  |
|     | <i>Pisum sativum</i> L. | 141 (12%)  | 9709.04  | 2.85 | 9703  |
| A17 | <i>Cynodon dactylon</i> | 550 (13%)  | 3773.61  | 2.80 | 3775  |
|     | <i>Pisum sativum</i> L. | 391 (9%)   | 15056.21 | 2.99 | 15056 |
| A18 | <i>Cynodon dactylon</i> | 273 (6%)   | 4555.69  | 3.05 | 4566  |
|     | <i>Pisum sativum</i> L. | 606 (14%)  | 13368.26 | 3.12 | 13389 |
| A19 | <i>Cynodon dactylon</i> | 765 (16%)  | 2786.09  | 3.25 | 2789  |
|     | <i>Pisum sativum</i> L. | 388 (8%)   | 10806.44 | 3.09 | 10790 |
| A20 | <i>Cynodon dactylon</i> | 431 (16%)  | 3232.19  | 2.68 | 3232  |
|     | <i>Pisum sativum</i> L. | 179 (6%)   | 9778.25  | 2.70 | 9778  |
| B1  | <i>Cynodon dactylon</i> | 372 (9%)   | 4799.27  | 3.04 | 4802  |
|     | <i>Pisum sativum</i> L. | 379 (9%)   | 12632.12 | 2.97 | 12626 |
| B2  | <i>Cynodon dactylon</i> | 219 (9%)   | 5280.76  | 2.94 | 5281  |
|     | <i>Pisum sativum</i> L. | 200 (8%)   | 11472.04 | 3.00 | 11453 |
| B3  | <i>Cynodon dactylon</i> | 1130 (12%) | 13274.52 | 2.89 | 13280 |
|     | <i>Pisum sativum</i> L. | 503 (5%)   | 5222.08  | 3.10 | 5225  |
| B4  | <i>Cynodon dactylon</i> | 273 (10%)  | 4845.33  | 2.95 | 4839  |

|     |                         |           |          |      |       |
|-----|-------------------------|-----------|----------|------|-------|
|     | <i>Pisum sativum</i> L. | 140 (5%)  | 10243.25 | 3.08 | 10221 |
| B5  | <i>Cynodon dactylon</i> | 297 (6%)  | 4496.72  | 3.08 | 4502  |
|     | <i>Pisum sativum</i> L. | 468 (9%)  | 11898.41 | 3.01 | 11905 |
| B6  | <i>Cynodon dactylon</i> | 518 (10%) | 3654.79  | 2.96 | 3666  |
|     | <i>Pisum sativum</i> L. | 384 (7%)  | 12692.70 | 2.99 | 12715 |
| B7  | <i>Cynodon dactylon</i> | 248 (8%)  | 4866.45  | 3.01 | 4853  |
|     | <i>Pisum sativum</i> L. | 152 (4%)  | 12421.00 | 3.02 | 12431 |
| B8  | <i>Cynodon dactylon</i> | 246 (9%)  | 4378.96  | 2.87 | 4385  |
|     | <i>Pisum sativum</i> L. | 210 (8%)  | 14331.08 | 2.83 | 14308 |
| B9  | <i>Cynodon dactylon</i> | 228 (8%)  | 4929.86  | 2.79 | 4929  |
|     | <i>Pisum sativum</i> L. | 215 (7%)  | 12328.70 | 2.83 | 12320 |
| B10 | <i>Cynodon dactylon</i> | 185 (7%)  | 5002.85  | 2.92 | 5015  |
|     | <i>Pisum sativum</i> L. | 188 (7%)  | 11147.82 | 2.86 | 11146 |
| B11 | <i>Cynodon dactylon</i> | 276 (13%) | 5283.44  | 3.06 | 5282  |
|     | <i>Pisum sativum</i> L. | 163 (7%)  | 13227.46 | 2.91 | 13275 |
| B12 | <i>Cynodon dactylon</i> | 116 (10%) | 4647.85  | 3.03 | 4644  |
|     | <i>Pisum sativum</i> L. | 60 (5%)   | 14096.52 | 2.90 | 14063 |
| B13 | <i>Cynodon dactylon</i> | 398 (12%) | 5163.73  | 3.16 | 5166  |
|     | <i>Pisum sativum</i> L. | 273 (8%)  | 13960.61 | 3.03 | 13933 |
| B14 | <i>Cynodon dactylon</i> | 325 (7%)  | 5284.18  | 2.90 | 5292  |
|     | <i>Pisum sativum</i> L. | 338 (8%)  | 12907.12 | 2.94 | 12928 |

|     |                         |            |          |      |       |
|-----|-------------------------|------------|----------|------|-------|
| B15 | <i>Cynodon dactylon</i> | 175 (6%)   | 3199.49  | 3.29 | 3194  |
|     | <i>Pisum sativum</i> L. | 211 (8%)   | 9872.81  | 3.00 | 9896  |
| B16 | <i>Cynodon dactylon</i> | 257 (10%)  | 5274.07  | 3.17 | 5273  |
|     | <i>Pisum sativum</i> L. | 135 (5%)   | 13168.41 | 2.91 | 13235 |
| B18 | <i>Cynodon dactylon</i> | 238 (11%)  | 3173.50  | 2.89 | 3172  |
|     | <i>Pisum sativum</i> L. | 259 (12%)  | 11293.49 | 2.91 | 11306 |
| B19 | <i>Cynodon dactylon</i> | 525 (4%)   | 5060.45  | 2.89 | 5060  |
|     | <i>Pisum sativum</i> L. | 1552 (13%) | 13158.06 | 2.88 | 13153 |
| B20 | <i>Cynodon dactylon</i> | 213 (10%)  | 5318.89  | 2.96 | 5315  |
|     | <i>Pisum sativum</i> L. | 162 (8%)   | 14173.61 | 2.93 | 14183 |
| C1  | <i>Cynodon dactylon</i> | 344 (6%)   | 3049.80  | 3.08 | 3056  |
|     | <i>Pisum sativum</i> L. | 514 (9%)   | 9982.75  | 2.92 | 9982  |
| C2  | <i>Cynodon dactylon</i> | 1212 (14%) | 3392.66  | 3.26 | 3393  |
|     | <i>Pisum sativum</i> L. | 491 (6%)   | 12783.64 | 2.97 | 12775 |
| C3  | <i>Cynodon dactylon</i> | 512 (11%)  | 2723.70  | 3.31 | 2723  |
|     | <i>Pisum sativum</i> L. | 558 (12%)  | 11270.69 | 2.91 | 11283 |
| C4  | <i>Cynodon dactylon</i> | 859 (11%)  | 3332.75  | 3.32 | 3335  |
|     | <i>Pisum sativum</i> L. | 587 (7%)   | 12233.70 | 3.05 | 12244 |
| C5  | <i>Cynodon dactylon</i> | 838 (4%)   | 3453.63  | 3.05 | 3452  |
|     | <i>Pisum sativum</i> L. | 2405 (14%) | 12760.11 | 3.05 | 12766 |
| C6  | <i>Cynodon dactylon</i> | 293 (6%)   | 4935.89  | 2.86 | 4941  |

|     |                         |            |          |      |       |
|-----|-------------------------|------------|----------|------|-------|
|     | <i>Pisum sativum</i> L. | 563 (12%)  | 12511.49 | 2.89 | 12521 |
| C7  | <i>Cynodon dactylon</i> | 369 (17%)  | 2912.04  | 3.12 | 2913  |
|     | <i>Pisum sativum</i> L. | 144 (6%)   | 8518.03  | 3.06 | 8529  |
| C10 | <i>Cynodon dactylon</i> | 871 (6%)   | 2981.45  | 3.08 | 2983  |
|     | <i>Pisum sativum</i> L. | 1602 (12%) | 11269.56 | 2.95 | 11282 |
| C11 | <i>Cynodon dactylon</i> | 1318 (9%)  | 3454.37  | 3.14 | 3455  |
|     | <i>Pisum sativum</i> L. | 1381 (10%) | 14428.08 | 3.18 | 14427 |
| C12 | <i>Cynodon dactylon</i> | 678 (19%)  | 2478.84  | 3.13 | 2476  |
|     | <i>Pisum sativum</i> L. | 407 (11%)  | 9355.77  | 3.06 | 9358  |
| C13 | <i>Cynodon dactylon</i> | 378 (13%)  | 2488.53  | 3.03 | 2492  |
|     | <i>Pisum sativum</i> L. | 282 (10%)  | 9929.57  | 2.93 | 9934  |
| C14 | <i>Cynodon dactylon</i> | 221 (11%)  | 3652.86  | 2.91 | 3647  |
|     | <i>Pisum sativum</i> L. | 115 (5%)   | 11691.55 | 2.95 | 11755 |
| C15 | <i>Cynodon dactylon</i> | 303 (17%)  | 3274.26  | 3.33 | 3275  |
|     | <i>Pisum sativum</i> L. | 132 (7%)   | 10183.26 | 3.11 | 10158 |
| C16 | <i>Cynodon dactylon</i> | 881 (9%)   | 2489.49  | 3.26 | 2490  |
|     | <i>Pisum sativum</i> L. | 956 (10%)  | 10158.43 | 3.04 | 10157 |
| C18 | <i>Cynodon dactylon</i> | 375 (8%)   | 2985.84  | 3.02 | 2989  |
|     | <i>Pisum sativum</i> L. | 450 (10%)  | 11291.30 | 3.05 | 11283 |
| C20 | <i>Cynodon dactylon</i> | 378 (7%)   | 2973.21  | 3.04 | 2971  |
|     | <i>Pisum sativum</i> L. | 472 (9%)   | 8992.47  | 3.09 | 8979  |

|     |                         |            |          |      |       |
|-----|-------------------------|------------|----------|------|-------|
| D1  | <i>Cynodon dactylon</i> | 1958 (10%) | 3262.29  | 3.39 | 3265  |
|     | <i>Pisum sativum</i> L. | 1931 (10%) | 13003.21 | 3.16 | 13011 |
| D2  | <i>Cynodon dactylon</i> | 577 (15%)  | 3328.06  | 3.24 | 3331  |
|     | <i>Pisum sativum</i> L. | 450 (11%)  | 15542.22 | 3.11 | 15580 |
| D3  | <i>Cynodon dactylon</i> | 89 (6%)    | 2590.48  | 3.27 | 2605  |
|     | <i>Pisum sativum</i> L. | 321 (22%)  | 11468.59 | 3.00 | 11451 |
| D4  | <i>Cynodon dactylon</i> | 715 (9%)   | 2491.09  | 3.10 | 2491  |
|     | <i>Pisum sativum</i> L. | 952 (12%)  | 10019.82 | 3.07 | 10022 |
| D5  | <i>Cynodon dactylon</i> | 1466 (12%) | 4256.13  | 2.99 | 4260  |
|     | <i>Pisum sativum</i> L. | 507 (4%)   | 12786.62 | 2.85 | 12823 |
| D6  | <i>Cynodon dactylon</i> | 862 (28%)  | 2494.58  | 3.07 | 2493  |
|     | <i>Pisum sativum</i> L. | 307 (10%)  | 10224.96 | 3.20 | 10219 |
| D7  | <i>Cynodon dactylon</i> | 311 (11%)  | 2560.15  | 3.01 | 2560  |
|     | <i>Pisum sativum</i> L. | 358 (13%)  | 11296.02 | 3.07 | 11284 |
| D8  | <i>Cynodon dactylon</i> | 428 (11%)  | 3584.99  | 3.01 | 3587  |
|     | <i>Pisum sativum</i> L. | 348 (9%)   | 15987.79 | 3.06 | 16008 |
| D9  | <i>Cynodon dactylon</i> | 618 (15%)  | 3763.88  | 3.33 | 3763  |
|     | <i>Pisum sativum</i> L. | 260 (6%)   | 10389.62 | 3.14 | 10364 |
| D10 | <i>Cynodon dactylon</i> | 987 (5%)   | 2783.97  | 3.34 | 2787  |
|     | <i>Pisum sativum</i> L. | 351 (19%)  | 10509.84 | 3.13 | 10489 |
| D11 | <i>Cynodon dactylon</i> | 467 (9%)   | 3400.78  | 3.14 | 3402  |

|     |                         |            |          |      |       |
|-----|-------------------------|------------|----------|------|-------|
|     | <i>Pisum sativum</i> L. | 718 (14%)  | 15200.12 | 2.81 | 15186 |
| D12 | <i>Cynodon dactylon</i> | 501 (13%)  | 2785.59  | 3.25 | 2784  |
|     | <i>Pisum sativum</i> L. | 460 (12%)  | 10723.06 | 2.91 | 10699 |
| D13 | <i>Cynodon dactylon</i> | 627 (18%)  | 2486.14  | 3.00 | 2483  |
|     | <i>Pisum sativum</i> L. | 494 (14%)  | 10436.49 | 2.99 | 10445 |
| D14 | <i>Cynodon dactylon</i> | 319 (14%)  | 2496.95  | 2.85 | 2500  |
|     | <i>Pisum sativum</i> L. | 339 (14%)  | 10778.67 | 2.87 | 10799 |
| D15 | <i>Cynodon dactylon</i> | 828 (10%)  | 2961.38  | 2.88 | 2960  |
|     | <i>Pisum sativum</i> L. | 789 (10%)  | 11803.14 | 3.09 | 11831 |
| D16 | <i>Cynodon dactylon</i> | 495 (9%)   | 4182.1   | 3.05 | 4175  |
|     | <i>Pisum sativum</i> L. | 544 (9%)   | 19387.09 | 2.81 | 19394 |
| D17 | <i>Cynodon dactylon</i> | 1001 (13%) | 3337.37  | 3.26 | 3340  |
|     | <i>Pisum sativum</i> L. | 740 (9%)   | 9359.48  | 3.06 | 9370  |
| D18 | <i>Cynodon dactylon</i> | 908 (16%)  | 2486.73  | 3.14 | 2488  |
|     | <i>Pisum sativum</i> L. | 734 (13%)  | 9525.11  | 3.06 | 9526  |
| E1  | <i>Cynodon dactylon</i> | 585 (27%)  | 2486.50  | 3.11 | 2488  |
|     | <i>Pisum sativum</i> L. | 147 (6%)   | 10525.35 | 3.13 | 10491 |
| E2  | <i>Cynodon dactylon</i> | 175 (10%)  | 2835.37  | 3.17 | 2836  |
|     | <i>Pisum sativum</i> L. | 265 (16%)  | 11709.75 | 3.12 | 11728 |
| E3  | <i>Cynodon dactylon</i> | 267 (7%)   | 2616.63  | 2.77 | 2612  |
|     | <i>Pisum sativum</i> L. | 666 (18%)  | 11262.98 | 2.98 | 11228 |

|     |                         |            |          |      |       |
|-----|-------------------------|------------|----------|------|-------|
| E4  | <i>Cynodon dactylon</i> | 2118 (13%) | 3866.39  | 3.22 | 3869  |
|     | <i>Pisum sativum</i> L. | 1031 (6%)  | 11328.88 | 3.24 | 11333 |
| E5  | <i>Cynodon dactylon</i> | 236 (8%)   | 2968.90  | 3.07 | 2966  |
|     | <i>Pisum sativum</i> L. | 527 (19%)  | 9783.46  | 2.98 | 9788  |
| E6  | <i>Cynodon dactylon</i> | 701 (12%)  | 3337.34  | 3.28 | 3336  |
|     | <i>Pisum sativum</i> L. | 454 (8%)   | 10106.66 | 2.93 | 10111 |
| E7  | <i>Cynodon dactylon</i> | 195 (14%)  | 2583.47  | 3.19 | 2582  |
|     | <i>Pisum sativum</i> L. | 269 (20%)  | 10258.51 | 2.95 | 10240 |
| E9  | <i>Cynodon dactylon</i> | 553 (17%)  | 3322.47  | 3.19 | 3320  |
|     | <i>Pisum sativum</i> L. | 271 (8%)   | 10161.61 | 2.92 | 10163 |
| E10 | <i>Cynodon dactylon</i> | 937 (10%)  | 3648.26  | 2.99 | 3653  |
|     | <i>Pisum sativum</i> L. | 843 (9%)   | 10709.92 | 2.88 | 10708 |
| E11 | <i>Cynodon dactylon</i> | 182 (22%)  | 2486.19  | 2.91 | 2487  |
|     | <i>Pisum sativum</i> L. | 109 (13%)  | 10410.26 | 2.85 | 10408 |
| E12 | <i>Cynodon dactylon</i> | 1529 (18%) | 3768.81  | 2.91 | 3766  |
|     | <i>Pisum sativum</i> L. | 463 (5%)   | 16934.08 | 2.97 | 16949 |
| E13 | <i>Cynodon dactylon</i> | 213 (18%)  | 2501.87  | 2.97 | 2560  |
|     | <i>Pisum sativum</i> L. | 173 (15%)  | 10109.68 | 2.88 | 10120 |
| E14 | <i>Cynodon dactylon</i> | 743 (16%)  | 3581.05  | 3.07 | 3585  |
|     | <i>Pisum sativum</i> L. | 417 (9%)   | 14976.96 | 2.81 | 14959 |
| E16 | <i>Cynodon dactylon</i> | 240 (16%)  | 3623.17  | 3.44 | 3622  |



|     |                         |            |          |      |       |
|-----|-------------------------|------------|----------|------|-------|
|     | <i>Pisum sativum</i> L. | 183 (12%)  | 10694.25 | 3.35 | 10660 |
| E17 | <i>Cynodon dactylon</i> | 2406 (11%) | 3996.59  | 3.19 | 3996  |
|     | <i>Pisum sativum</i> L. | 1545 (7%)  | 11317.17 | 2.90 | 11323 |
| E18 | <i>Cynodon dactylon</i> | 3818 (12%) | 3932.83  | 3.28 | 3933  |
|     | <i>Pisum sativum</i> L. | 1867 (6%)  | 11653.23 | 3.16 | 11654 |
| E19 | <i>Cynodon dactylon</i> | 1015 (14%) | 3713.67  | 2.94 | 3715  |
|     | <i>Pisum sativum</i> L. | 295 (4%)   | 10998.94 | 2.92 | 10980 |
| F1  | <i>Cynodon dactylon</i> | 1282 (12%) | 1635.16  | 3.33 | 1638  |
|     | <i>Pisum sativum</i> L. | 1171 (11%) | 4289.64  | 3.32 | 4291  |
| F2  | <i>Cynodon dactylon</i> | 1181 (13%) | 1568.00  | 3.42 | 1569  |
|     | <i>Pisum sativum</i> L. | 747 (8%)   | 3873.62  | 3.32 | 3879  |
| F3  | <i>Cynodon dactylon</i> | 511 (7%)   | 1766.60  | 3.12 | 1765  |
|     | <i>Pisum sativum</i> L. | 1081 (15%) | 4801.44  | 3.06 | 4805  |
| F4  | <i>Cynodon dactylon</i> | 661 (10%)  | 1632.81  | 3.36 | 1635  |
|     | <i>Pisum sativum</i> L. | 698 (10%)  | 4362.99  | 3.34 | 4364  |
| F6  | <i>Cynodon dactylon</i> | 715 (9%)   | 1409.13  | 2.62 | 1410  |
|     | <i>Pisum sativum</i> L. | 573 (7%)   | 4035.87  | 2.70 | 4037  |
| F7  | <i>Cynodon dactylon</i> | 1270 (9%)  | 1408.02  | 2.61 | 1410  |
|     | <i>Pisum sativum</i> L. | 1206 (8%)  | 5185.90  | 2.80 | 5191  |
| F9  | <i>Cynodon dactylon</i> | 717 (9%)   | 1763.00  | 3.15 | 1763  |
|     | <i>Pisum sativum</i> L. | 1015 (13%) | 4734.49  | 3.10 | 4738  |

|     |                         |            |          |      |       |
|-----|-------------------------|------------|----------|------|-------|
| F10 | <i>Cynodon dactylon</i> | 633 (8%)   | 1536.43  | 2.44 | 1536  |
|     | <i>Pisum sativum</i> L. | 782 (10%)  | 4096.49  | 2.63 | 4100  |
| F13 | <i>Cynodon dactylon</i> | 1585 (6%)  | 1825.24  | 3.02 | 1824  |
|     | <i>Pisum sativum</i> L. | 2957 (12%) | 5055.69  | 2.90 | 5055  |
| F14 | <i>Cynodon dactylon</i> | 837 (7%)   | 1954.02  | 3.78 | 1957  |
|     | <i>Pisum sativum</i> L. | 1117 (10%) | 4971.00  | 3.22 | 4968  |
| F15 | <i>Cynodon dactylon</i> | 1570 (14%) | 1635.66  | 3.32 | 1638  |
|     | <i>Pisum sativum</i> L. | 575 (5%)   | 4360.76  | 3.33 | 4365  |
| F16 | <i>Cynodon dactylon</i> | 1904 (15%) | 1568.04  | 3.40 | 1567  |
|     | <i>Pisum sativum</i> L. | 1316 (10%) | 5533.12  | 3.52 | 5534  |
| F18 | <i>Cynodon dactylon</i> | 4489 (8%)  | 2142.18  | 2.52 | 2142  |
|     | <i>Pisum sativum</i> L. | 7428 (13%) | 5546.04  | 2.93 | 5552  |
| F19 | <i>Cynodon dactylon</i> | 1228 (2%)  | 1889.65  | 2.91 | 1893  |
|     | <i>Pisum sativum</i> L. | 9077 (19%) | 4996.44  | 2.90 | 5000  |
| F20 | <i>Cynodon dactylon</i> | 1720 (12%) | 1345.32  | 2.73 | 1347  |
|     | <i>Pisum sativum</i> L. | 1291 (9%)  | 5123.75  | 2.88 | 5128  |
| G1  | <i>Cynodon dactylon</i> | 539 (10%)  | 3837.01  | 2.82 | 3845  |
|     | <i>Pisum sativum</i> L. | 374 (7%)   | 13893.37 | 2.87 | 13912 |
| G2  | <i>Cynodon dactylon</i> | 827 (16%)  | 2652.17  | 3.44 | 2651  |
|     | <i>Pisum sativum</i> L. | 514 (10%)  | 9639.51  | 3.19 | 9654  |
| G3  | <i>Cynodon dactylon</i> | 189 (23%)  | 2847.11  | 3.17 | 2858  |

|     |                         |           |          |      |       |
|-----|-------------------------|-----------|----------|------|-------|
|     | <i>Pisum sativum</i> L. | 21 (2%)   | 10231.43 | 3.11 | 10152 |
| G4  | <i>Cynodon dactylon</i> | 353 (20%) | 2642.07  | 3.35 | 2641  |
|     | <i>Pisum sativum</i> L. | 146 (8%)  | 10306.50 | 3.01 | 10351 |
| G5  | <i>Cynodon dactylon</i> | 163 (13%) | 2478.15  | 3.22 | 2476  |
|     | <i>Pisum sativum</i> L. | 163 (13%) | 10234.01 | 3.09 | 10235 |
| G6  | <i>Cynodon dactylon</i> | 310 (12%) | 2494.00  | 2.88 | 2490  |
|     | <i>Pisum sativum</i> L. | 300 (11%) | 9991.16  | 2.95 | 10000 |
| G7  | <i>Cynodon dactylon</i> | 201 (6%)  | 2479.11  | 3.17 | 2477  |
|     | <i>Pisum sativum</i> L. | 497 (17%) | 8074.42  | 3.01 | 8088  |
| G9  | <i>Cynodon dactylon</i> | 613 (10%) | 2495.84  | 3.00 | 2494  |
|     | <i>Pisum sativum</i> L. | 820 (13%) | 9586.36  | 2.95 | 9588  |
| G10 | <i>Cynodon dactylon</i> | 789 (13%) | 3296.43  | 2.78 | 3298  |
|     | <i>Pisum sativum</i> L. | 406 (%)   | 13592.17 | 2.96 | 13604 |
| G11 | <i>Cynodon dactylon</i> | 383 (13%) | 2537.34  | 3.54 | 2542  |
|     | <i>Pisum sativum</i> L. | 452 (15%) | 10010.48 | 3.34 | 10015 |
| G12 | <i>Cynodon dactylon</i> | 230 (21%) | 2726.62  | 3.08 | 2735  |
|     | <i>Pisum sativum</i> L. | 58 (5%)   | 10663.83 | 2.92 | 10698 |
| G13 | <i>Cynodon dactylon</i> | 207 (22%) | 2525.27  | 3.22 | 2526  |
|     | <i>Pisum sativum</i> L. | 74 (7%)   | 9268.14  | 3.25 | 9294  |
| G14 | <i>Cynodon dactylon</i> | 315 (16%) | 2493.66  | 2.98 | 2491  |
|     | <i>Pisum sativum</i> L. | 210 (11%) | 10325.17 | 2.95 | 10254 |

|     |                         |            |          |      |       |
|-----|-------------------------|------------|----------|------|-------|
| G15 | <i>Cynodon dactylon</i> | 419 (14%)  | 2489.98  | 3.13 | 2492  |
|     | <i>Pisum sativum</i> L. | 310 (10%)  | 9008.80  | 3.07 | 9024  |
| G16 | <i>Cynodon dactylon</i> | 391 (11%)  | 3459.51  | 3.09 | 3462  |
|     | <i>Pisum sativum</i> L. | 283 (7%)   | 9777.47  | 3.24 | 9781  |
| G17 | <i>Cynodon dactylon</i> | 185 (8%)   | 2989.35  | 2.82 | 2988  |
|     | <i>Pisum sativum</i> L. | 263 (11%)  | 9772.01  | 2.85 | 9808  |
| G18 | <i>Cynodon dactylon</i> | 1298 (22%) | 2491.26  | 3.04 | 2489  |
|     | <i>Pisum sativum</i> L. | 433 (7%)   | 9594.05  | 3.12 | 9565  |
| G19 | <i>Cynodon dactylon</i> | 643 (14%)  | 2488.50  | 3.01 | 2490  |
|     | <i>Pisum sativum</i> L. | 482 (11%)  | 9687.62  | 2.90 | 9672  |
| G20 | <i>Cynodon dactylon</i> | 257 (14%)  | 4194.42  | 2.97 | 4199  |
|     | <i>Pisum sativum</i> L. | 56 (3%)    | 15352.79 | 2.84 | 15399 |
| H1  | <i>Cynodon dactylon</i> | 180 (7%)   | 2558.98  | 2.78 | 2566  |
|     | <i>Pisum sativum</i> L. | 454 (17%)  | 10724.63 | 2.83 | 10735 |
| H2  | <i>Cynodon dactylon</i> | 426 (14%)  | 3766.65  | 2.82 | 3770  |
|     | <i>Pisum sativum</i> L. | 226 (7%)   | 16028.10 | 2.96 | 16060 |
| H3  | <i>Cynodon dactylon</i> | 545 (5%)   | 11337.84 | 2.88 | 11363 |
|     | <i>Pisum sativum</i> L. | 1364 (12%) | 3711.19  | 2.96 | 3710  |
| H4  | <i>Cynodon dactylon</i> | 1284 (16%) | 4120.51  | 3.09 | 4121  |
|     | <i>Pisum sativum</i> L. | 370 (4%)   | 16706.48 | 2.96 | 16712 |
| H6  | <i>Cynodon dactylon</i> | 880 (13%)  | 3397.47  | 3.17 | 3400  |

|     |                         |           |          |      |       |
|-----|-------------------------|-----------|----------|------|-------|
|     | <i>Pisum sativum</i> L. | 572 (8%)  | 9905.23  | 3.09 | 9902  |
| H7  | <i>Cynodon dactylon</i> | 217 (11%) | 3235.82  | 2.91 | 3248  |
|     | <i>Pisum sativum</i> L. | 165 (8%)  | 10118.90 | 2.90 | 10102 |
| H8  | <i>Cynodon dactylon</i> | 440 (11%) | 3291.92  | 2.76 | 3289  |
|     | <i>Pisum sativum</i> L. | 379 (9%)  | 10713.24 | 2.82 | 10700 |
| H9  | <i>Cynodon dactylon</i> | 197 (5%)  | 3446.48  | 3.10 | 3455  |
|     | <i>Pisum sativum</i> L. | 679 (17%) | 10991.70 | 2.97 | 10986 |
| H10 | <i>Cynodon dactylon</i> | 267 (9%)  | 3323.14  | 3.41 | 3337  |
|     | <i>Pisum sativum</i> L. | 350 (12%) | 10722.03 | 2.97 | 10717 |
| H11 | <i>Cynodon dactylon</i> | 195 (17%) | 3520.28  | 3.15 | 3520  |
|     | <i>Pisum sativum</i> L. | 676 (5%)  | 10755.64 | 2.98 | 10777 |
| H12 | <i>Cynodon dactylon</i> | 297 (9%)  | 4133.55  | 3.13 | 4145  |
|     | <i>Pisum sativum</i> L. | 290 (9%)  | 14067.35 | 2.88 | 14036 |
| H13 | <i>Cynodon dactylon</i> | 231 (8%)  | 2482.46  | 2.81 | 2485  |
|     | <i>Pisum sativum</i> L. | 434 (16%) | 8373.42  | 2.70 | 8390  |
| H14 | <i>Cynodon dactylon</i> | 404 (11%) | 3462.25  | 2.97 | 3471  |
|     | <i>Pisum sativum</i> L. | 365 (10%) | 10359.39 | 3.09 | 10349 |
| H15 | <i>Cynodon dactylon</i> | 369 (6%)  | 3523.96  | 3.07 | 3515  |
|     | <i>Pisum sativum</i> L. | 707 (11%) | 10659.74 | 2.88 | 10670 |
| H17 | <i>Cynodon dactylon</i> | 605 (15%) | 4000.25  | 3.17 | 3998  |
|     | <i>Pisum sativum</i> L. | 288 (17%) | 11418.77 | 3.25 | 11451 |

|     |                         |            |          |      |       |
|-----|-------------------------|------------|----------|------|-------|
| H19 | <i>Cynodon dactylon</i> | 228 (13%)  | 3403.80  | 3.07 | 3409  |
|     | <i>Pisum sativum</i> L. | 141 (8%)   | 10009.15 | 2.79 | 9984  |
| H20 | <i>Cynodon dactylon</i> | 213 (14%)  | 3237.49  | 2.70 | 3239  |
|     | <i>Pisum sativum</i> L. | 129 (8%)   | 9983.89  | 2.78 | 10004 |
| I1  | <i>Cynodon dactylon</i> | 340 (18%)  | 2479.49  | 3.19 | 2472  |
|     | <i>Pisum sativum</i> L. | 153 (8%)   | 10478.77 | 3.00 | 10478 |
| I2  | <i>Cynodon dactylon</i> | 523 (13%)  | 2533.94  | 3.46 | 2530  |
|     | <i>Pisum sativum</i> L. | 507 (12%)  | 11295.22 | 3.40 | 11287 |
| I3  | <i>Cynodon dactylon</i> | 665 (12%)  | 5408.06  | 3.05 | 5405  |
|     | <i>Pisum sativum</i> L. | 547 (9%)   | 19360.21 | 2.97 | 19326 |
| I4  | <i>Cynodon dactylon</i> | 1832 (18%) | 3964.51  | 2.75 | 3964  |
|     | <i>Pisum sativum</i> L. | 546 (5%)   | 15629.24 | 2.78 | 15632 |
| I5  | <i>Cynodon dactylon</i> | 622 (17%)  | 2489.92  | 2.98 | 2488  |
|     | <i>Pisum sativum</i> L. | 432(11%)   | 11091.93 | 3.09 | 11100 |
| I6  | <i>Cynodon dactylon</i> | 1168 (26%) | 2539.06  | 3.48 | 2541  |
|     | <i>Pisum sativum</i> L. | 148 (3%)   | 11646.77 | 3.26 | 11664 |
| I7  | <i>Cynodon dactylon</i> | 370 (11%)  | 2977.99  | 3.06 | 2968  |
|     | <i>Pisum sativum</i> L. | 457 (14%)  | 14229.79 | 3.05 | 14232 |
| I8  | <i>Cynodon dactylon</i> | 1493 (8%)  | 2976.11  | 3.02 | 2975  |
|     | <i>Pisum sativum</i> L. | 2064 (11%) | 11572.37 | 3.00 | 11587 |
| I10 | <i>Cynodon dactylon</i> | 525 (15%)  | 3583.12  | 3.07 | 3590  |

|     |                         |            |          |      |       |
|-----|-------------------------|------------|----------|------|-------|
|     | <i>Pisum sativum</i> L. | 259 (7%)   | 13006.98 | 2.96 | 12989 |
| I11 | <i>Cynodon dactylon</i> | 644 (13%)  | 3840.57  | 2.80 | 3845  |
|     | <i>Pisum sativum</i> L. | 224 (4%)   | 15939.34 | 2.83 | 15939 |
| I12 | <i>Cynodon dactylon</i> | 1604 (20%) | 4320.19  | 3.00 | 4322  |
|     | <i>Pisum sativum</i> L. | 170 (2%)   | 18652.82 | 2.88 | 18641 |
| I13 | <i>Cynodon dactylon</i> | 1563 (15%) | 3711.18  | 2.90 | 3711  |
|     | <i>Pisum sativum</i> L. | 719 (7%)   | 14724.50 | 2.80 | 14725 |
| I14 | <i>Cynodon dactylon</i> | 132 (22%)  | 2518.00  | 3.37 | 2516  |
|     | <i>Pisum sativum</i> L. | 78 (13%)   | 10230.35 | 3.36 | 10266 |
| I15 | <i>Cynodon dactylon</i> | 458 (19%)  | 2653.66  | 3.42 | 2657  |
|     | <i>Pisum sativum</i> L. | 287 (11%)  | 10941.13 | 3.23 | 10947 |
| I16 | <i>Cynodon dactylon</i> | 472 (15%)  | 3167.01  | 2.92 | 3166  |
|     | <i>Pisum sativum</i> L. | 147 (4%)   | 14755.91 | 2.78 | 14803 |
| I17 | <i>Cynodon dactylon</i> | 757 (17%)  | 3233.06  | 2.79 | 3230  |
|     | <i>Pisum sativum</i> L. | 212 (4%)   | 13807.50 | 2.74 | 13823 |
| I18 | <i>Cynodon dactylon</i> | 1561 (18%) | 3361.33  | 2.70 | 3364  |
|     | <i>Pisum sativum</i> L. | 585 (6%)   | 13235.98 | 2.88 | 13248 |
| I19 | <i>Cynodon dactylon</i> | 817 (18%)  | 4034.92  | 2.71 | 4034  |
|     | <i>Pisum sativum</i> L. | 123 (2%)   | 16922.76 | 2.70 | 16968 |
| I20 | <i>Cynodon dactylon</i> | 350 (21%)  | 2489.32  | 3.01 | 2488  |
|     | <i>Pisum sativum</i> L. | 141 (8%)   | 9842.62  | 2.89 | 9851  |

|     |                         |           |          |      |       |
|-----|-------------------------|-----------|----------|------|-------|
| J1  | <i>Cynodon dactylon</i> | 260 (5%)  | 4918.35  | 3.09 | 4929  |
|     | <i>Pisum sativum</i> L. | 704 (14%) | 12005.64 | 2.81 | 12005 |
| J2  | <i>Cynodon dactylon</i> | 383 (9%)  | 4598.79  | 3.08 | 4598  |
|     | <i>Pisum sativum</i> L. | 485 (11%) | 11382.84 | 2.91 | 11375 |
| J3  | <i>Cynodon dactylon</i> | 415 (8%)  | 3322.31  | 3.22 | 3326  |
|     | <i>Pisum sativum</i> L. | 402 (8%)  | 11743.30 | 2.94 | 11726 |
| J4  | <i>Cynodon dactylon</i> | 378 (7%)  | 4867.18  | 2.90 | 4868  |
|     | <i>Pisum sativum</i> L. | 522 (9%)  | 11485.81 | 2.73 | 11485 |
| J6  | <i>Cynodon dactylon</i> | 282 (8%)  | 4710.79  | 2.75 | 4714  |
|     | <i>Pisum sativum</i> L. | 384 (11%) | 12096.85 | 3.00 | 12092 |
| J7  | <i>Cynodon dactylon</i> | 186 (12%) | 4785.40  | 3.03 | 4771  |
|     | <i>Pisum sativum</i> L. | 147 (10%) | 11984.10 | 2.81 | 11986 |
| J8  | <i>Cynodon dactylon</i> | 277 (13%) | 3388.59  | 3.10 | 3398  |
|     | <i>Pisum sativum</i> L. | 237 (11%) | 12856.05 | 2.92 | 12850 |
| J9  | <i>Cynodon dactylon</i> | 233 (13%) | 4914.72  | 2.96 | 4905  |
|     | <i>Pisum sativum</i> L. | 163 (9%)  | 10785.54 | 3.07 | 10782 |
| J10 | <i>Cynodon dactylon</i> | 471 (6%)  | 4676.60  | 3.08 | 4675  |
|     | <i>Pisum sativum</i> L. | 723 (10%) | 11834.35 | 2.75 | 11825 |
| J11 | <i>Cynodon dactylon</i> | 331 (12%) | 2907.64  | 2.94 | 2904  |
|     | <i>Pisum sativum</i> L. | 172 (6%)  | 12735.34 | 2.93 | 12755 |
| J12 | <i>Cynodon dactylon</i> | 902 (12%) | 3774.38  | 2.95 | 3773  |



|     |                         |           |          |      |       |
|-----|-------------------------|-----------|----------|------|-------|
|     | <i>Pisum sativum</i> L. | 451 (6%)  | 13428.92 | 2.82 | 13438 |
| J13 | <i>Cynodon dactylon</i> | 114 (10%) | 3392.11  | 3.26 | 3412  |
|     | <i>Pisum sativum</i> L. | 134 (12%) | 12761.18 | 3.10 | 12754 |
| J14 | <i>Cynodon dactylon</i> | 426 (17%) | 3449.50  | 2.99 | 3450  |
|     | <i>Pisum sativum</i> L. | 222 (9%)  | 12508.73 | 3.05 | 12500 |
| J15 | <i>Cynodon dactylon</i> | 217 (13%) | 3422.20  | 2.65 | 3425  |
|     | <i>Pisum sativum</i> L. | 156 (9%)  | 12178.29 | 2.81 | 12192 |
| J17 | <i>Cynodon dactylon</i> | 227 (7%)  | 3166.03  | 2.87 | 3160  |
|     | <i>Pisum sativum</i> L. | 370 (12%) | 11408.12 | 2.73 | 11442 |
| J18 | <i>Cynodon dactylon</i> | 752 (19%) | 3239.58  | 2.80 | 3244  |
|     | <i>Pisum sativum</i> L. | 171 (4%)  | 11277.09 | 2.86 | 11284 |
| J19 | <i>Cynodon dactylon</i> | 342 (10%) | 3166.20  | 2.81 | 3175  |
|     | <i>Pisum sativum</i> L. | 555 (16%) | 12033.49 | 3.70 | 12020 |
| J20 | <i>Cynodon dactylon</i> | 275 (15%) | 3129.76  | 3.37 | 3128  |
|     | <i>Pisum sativum</i> L. | 168 (9%)  | 11666.51 | 3.17 | 11710 |
| K1  | <i>Cynodon dactylon</i> | 118 (13%) | 4127.19  | 2.92 | 4128  |
|     | <i>Pisum sativum</i> L. | 40 (4%)   | 11033.45 | 2.97 | 10986 |
| K2  | <i>Cynodon dactylon</i> | 130 (10%) | 3945.75  | 3.17 | 3941  |
|     | <i>Pisum sativum</i> L. | 97 (7%)   | 11122.08 | 3.12 | 11091 |
| K3  | <i>Cynodon dactylon</i> | 460 (10%) | 3396.56  | 3.22 | 3399  |
|     | <i>Pisum sativum</i> L. | 450 (10%) | 10426.50 | 3.08 | 10416 |

|     |                         |            |          |      |       |
|-----|-------------------------|------------|----------|------|-------|
| K4  | <i>Cynodon dactylon</i> | 262 (6%)   | 3842.23  | 2.92 | 3837  |
|     | <i>Pisum sativum</i> L. | 451 (11%)  | 11327.98 | 2.91 | 11331 |
| K5  | <i>Cynodon dactylon</i> | 327 (11%)  | 2490.60  | 3.03 | 2492  |
|     | <i>Pisum sativum</i> L. | 351 (12%)  | 9882.80  | 3.06 | 9873  |
| K6  | <i>Cynodon dactylon</i> | 1625 (14%) | 2913.30  | 3.15 | 2914  |
|     | <i>Pisum sativum</i> L. | 821 (7%)   | 12931.55 | 3.03 | 12933 |
| K7  | <i>Cynodon dactylon</i> | 316 (19%)  | 3204.93  | 3.33 | 3208  |
|     | <i>Pisum sativum</i> L. | 78 (4%)    | 11288.17 | 3.02 | 11332 |
| K8  | <i>Cynodon dactylon</i> | 756 (20%)  | 3038.45  | 3.01 | 3042  |
|     | <i>Pisum sativum</i> L. | 188 (5%)   | 11256.78 | 2.82 | 11229 |
| K9  | <i>Cynodon dactylon</i> | 238 (6%)   | 2491.64  | 3.04 | 2491  |
|     | <i>Pisum sativum</i> L. | 565 (15%)  | 9867.31  | 3.01 | 9857  |
| K10 | <i>Cynodon dactylon</i> | 438 (16%)  | 4003.48  | 3.11 | 4010  |
|     | <i>Pisum sativum</i> L. | 160 (6%)   | 10856.74 | 3.00 | 10842 |
| K11 | <i>Cynodon dactylon</i> | 461 (12%)  | 3773.31  | 2.89 | 3777  |
|     | <i>Pisum sativum</i> L. | 306 (8%)   | 10849.25 | 2.80 | 10838 |
| K12 | <i>Cynodon dactylon</i> | 347 (7%)   | 3520.38  | 3.11 | 3520  |
|     | <i>Pisum sativum</i> L. | 441 (9%)   | 10148.41 | 3.17 | 10142 |
| K13 | <i>Cynodon dactylon</i> | 369 (14%)  | 2527.33  | 3.64 | 2535  |
|     | <i>Pisum sativum</i> L. | 245 (9%)   | 9454.44  | 3.43 | 9455  |
| K14 | <i>Cynodon dactylon</i> | 212 (16%)  | 2627.26  | 2.78 | 2630  |

|     |                         |           |          |      |       |
|-----|-------------------------|-----------|----------|------|-------|
|     | <i>Pisum sativum</i> L. | 122 (9%)  | 11295.10 | 2.79 | 11298 |
| K16 | <i>Cynodon dactylon</i> | 81 (7%)   | 2438.34  | 3.00 | 2428  |
|     | <i>Pisum sativum</i> L. | 91 (8%)   | 8865.22  | 2.82 | 8887  |
| K17 | <i>Cynodon dactylon</i> | 209 (17%) | 3160.64  | 2.79 | 3161  |
|     | <i>Pisum sativum</i> L. | 61 (5%)   | 11523.64 | 2.72 | 11562 |
| K18 | <i>Cynodon dactylon</i> | 630 (16%) | 2485.40  | 3.15 | 2489  |
|     | <i>Pisum sativum</i> L. | 454 (11%) | 10407.22 | 2.85 | 10409 |
| K19 | <i>Cynodon dactylon</i> | 192 (28%) | 2643.01  | 3.38 | 2648  |
|     | <i>Pisum sativum</i> L. | 36 (5%)   | 10033.11 | 3.22 | 10073 |
| K20 | <i>Cynodon dactylon</i> | 894 (19%) | 2716.77  | 3.36 | 2719  |
|     | <i>Pisum sativum</i> L. | 353 (7%)  | 10103.52 | 3.17 | 10099 |
| L1  | <i>Cynodon dactylon</i> | 578 (10%) | 4645.01  | 2.74 | 4651  |
|     | <i>Pisum sativum</i> L. | 317 (5%)  | 13052.98 | 2.95 | 13097 |
| L2  | <i>Cynodon dactylon</i> | 590 (9%)  | 4640.58  | 2.76 | 4642  |
|     | <i>Pisum sativum</i> L. | 486 (7%)  | 13528.94 | 2.78 | 13508 |
| L3  | <i>Cynodon dactylon</i> | 599 (9%)  | 5190.90  | 2.85 | 5194  |
|     | <i>Pisum sativum</i> L. | 327 (5%)  | 15129.55 | 2.90 | 15180 |
| L4  | <i>Cynodon dactylon</i> | 321 (14%) | 4390.99  | 2.98 | 4397  |
|     | <i>Pisum sativum</i> L. | 93 (4%)   | 12334.34 | 2.71 | 12339 |
| L5  | <i>Cynodon dactylon</i> | 582 (11%) | 3996.78  | 3.17 | 3998  |
|     | <i>Pisum sativum</i> L. | 508 (10%) | 11216.45 | 2.94 | 11191 |

|     |                         |            |          |      |       |
|-----|-------------------------|------------|----------|------|-------|
| L6  | <i>Cynodon dactylon</i> | 1161 (19%) | 3591.54  | 3.05 | 3595  |
|     | <i>Pisum sativum</i> L. | 116 (1%)   | 16339.91 | 3.16 | 16321 |
| L8  | <i>Cynodon dactylon</i> | 128 (12%)  | 2975.88  | 2.94 | 2979  |
|     | <i>Pisum sativum</i> L. | 62 (6%)    | 11801.00 | 2.75 | 11787 |
| L9  | <i>Cynodon dactylon</i> | 518 (13%)  | 3708.31  | 2.93 | 3718  |
|     | <i>Pisum sativum</i> L. | 362 (9%)   | 15364.33 | 2.70 | 15363 |
| L10 | <i>Cynodon dactylon</i> | 230 (18%)  | 2712.77  | 3.16 | 2714  |
|     | <i>Pisum sativum</i> L. | 108 (8%)   | 11694.65 | 2.97 | 11726 |
| L11 | <i>Cynodon dactylon</i> | 254 (20%)  | 3494.46  | 2.53 | 3492  |
|     | <i>Pisum sativum</i> L. | 64 (5%)    | 14083.88 | 2.61 | 14095 |
| L12 | <i>Cynodon dactylon</i> | 342 (21%)  | 2537.84  | 3.45 | 2542  |
|     | <i>Pisum sativum</i> L. | 161 (10%)  | 10712.93 | 3.10 | 10734 |
| L13 | <i>Cynodon dactylon</i> | 340 (14%)  | 2482.26  | 3.26 | 2486  |
|     | <i>Pisum sativum</i> L. | 263 (11%)  | 10213.87 | 3.15 | 10215 |
| L14 | <i>Cynodon dactylon</i> | 629 (22%)  | 2556.45  | 2.77 | 2556  |
|     | <i>Pisum sativum</i> L. | 209 (7%)   | 10883.06 | 2.99 | 10895 |
| L15 | <i>Cynodon dactylon</i> | 1341 (19%) | 2503.27  | 2.89 | 2504  |
|     | <i>Pisum sativum</i> L. | 369 (5%)   | 10739.60 | 3.01 | 10745 |
| L16 | <i>Cynodon dactylon</i> | 351 (16%)  | 2622.33  | 2.76 | 2621  |
|     | <i>Pisum sativum</i> L. | 135 (6%)   | 10943.86 | 2.69 | 10918 |
| L17 | <i>Cynodon dactylon</i> | 591 (17%)  | 2562.35  | 2.80 | 2564  |

|     |                         |            |          |      |       |
|-----|-------------------------|------------|----------|------|-------|
|     | <i>Pisum sativum</i> L. | 389 (11%)  | 10747.79 | 2.97 | 10729 |
| L18 | <i>Cynodon dactylon</i> | 583 (18%)  | 2562.28  | 2.85 | 2565  |
|     | <i>Pisum sativum</i> L. | 240 (7%)   | 11764.85 | 2.74 | 11778 |
| L19 | <i>Cynodon dactylon</i> | 637 (15%)  | 3453.07  | 3.09 | 3454  |
|     | <i>Pisum sativum</i> L. | 361 (8%)   | 14695.65 | 2.86 | 14730 |
| L20 | <i>Cynodon dactylon</i> | 1049 (6%)  | 3458.50  | 3.17 | 3458  |
|     | <i>Pisum sativum</i> L. | 1801 (11%) | 15354.37 | 2.82 | 15349 |
| M1  | <i>Cynodon dactylon</i> | 549 (13%)  | 3038.24  | 2.97 | 3040  |
|     | <i>Pisum sativum</i> L. | 433 (11%)  | 11430.58 | 2.99 | 11427 |
| M2  | <i>Cynodon dactylon</i> | 731 (15%)  | 3775.54  | 2.83 | 3779  |
|     | <i>Pisum sativum</i> L. | 257 (5%)   | 10191.38 | 2.88 | 10201 |
| M3  | <i>Cynodon dactylon</i> | 177 (11%)  | 1151.27  | 3.24 | 1151  |
|     | <i>Pisum sativum</i> L. | 198 (12%)  | 3126.33  | 3.36 | 3128  |
| M4  | <i>Cynodon dactylon</i> | 580 (13%)  | 4576.23  | 2.75 | 4581  |
|     | <i>Pisum sativum</i> L. | 296 (6%)   | 12544.80 | 2.70 | 12551 |
| M5  | <i>Cynodon dactylon</i> | 615 (15%)  | 2691.66  | 2.77 | 2694  |
|     | <i>Pisum sativum</i> L. | 397 (10%)  | 10989.36 | 2.74 | 11006 |
| M6  | <i>Cynodon dactylon</i> | 456 (18%)  | 3232.73  | 2.93 | 3239  |
|     | <i>Pisum sativum</i> L. | 137 (5%)   | 14839.42 | 2.93 | 14815 |
| M7  | <i>Cynodon dactylon</i> | 1534 (6%)  | 4475.46  | 3.22 | 4472  |
|     | <i>Pisum sativum</i> L. | 2753 (11%) | 12702.07 | 3.00 | 12703 |

|     |                         |            |          |      |       |
|-----|-------------------------|------------|----------|------|-------|
| M8  | <i>Cynodon dactylon</i> | 583 (19%)  | 3718.67  | 2.86 | 3713  |
|     | <i>Pisum sativum</i> L. | 173 (5%)   | 11447.31 | 2.81 | 11426 |
| M11 | <i>Cynodon dactylon</i> | 163 (8%)   | 2774.74  | 2.93 | 2782  |
|     | <i>Pisum sativum</i> L. | 175 (9%)   | 11189.88 | 2.89 | 11216 |
| M13 | <i>Cynodon dactylon</i> | 425 (9%)   | 3526.65  | 3.19 | 3519  |
|     | <i>Pisum sativum</i> L. | 536 (11%)  | 11712.60 | 3.03 | 11709 |
| M14 | <i>Cynodon dactylon</i> | 394 (8%)   | 4062.09  | 3.11 | 4066  |
|     | <i>Pisum sativum</i> L. | 481 (10%)  | 11155.34 | 2.83 | 11127 |
| M15 | <i>Cynodon dactylon</i> | 292 (16%)  | 3649.01  | 3.02 | 3652  |
|     | <i>Pisum sativum</i> L. | 179 (9%)   | 11152.55 | 3.12 | 11158 |
| M16 | <i>Cynodon dactylon</i> | 5606 (17%) | 5190.09  | 2.79 | 5193  |
|     | <i>Pisum sativum</i> L. | 1630 (5%)  | 21198.62 | 2.69 | 21188 |
| M19 | <i>Cynodon dactylon</i> | 301 (6%)   | 3931.68  | 3.21 | 3932  |
|     | <i>Pisum sativum</i> L. | 703 (15%)  | 10622.81 | 2.95 | 10625 |
| M20 | <i>Cynodon dactylon</i> | 936 (10%)  | 3102.95  | 2.88 | 3105  |
|     | <i>Pisum sativum</i> L. | 963 (10%)  | 8500.99  | 2.89 | 8504  |

A, Lianyungang; B, Tancheng; C, Zaozhuang; D, Shanxian; E, Lankao; F, Zhengzhou; G, Luoyang; H, Sanmenxia; I, Tongguan; J, Jingyang; K, Fufeng; L, Baoji; M, Tianshui. A1 represents the first sample collected in A region. The other samples were named by the same way.
